# Supplementary material
Source: PubMed Central journal article supplement (PMC4263142)
Supplement: ncomms6592-s1.pdf [file ncomms6592-s1.pdf]

# Supplementary Information

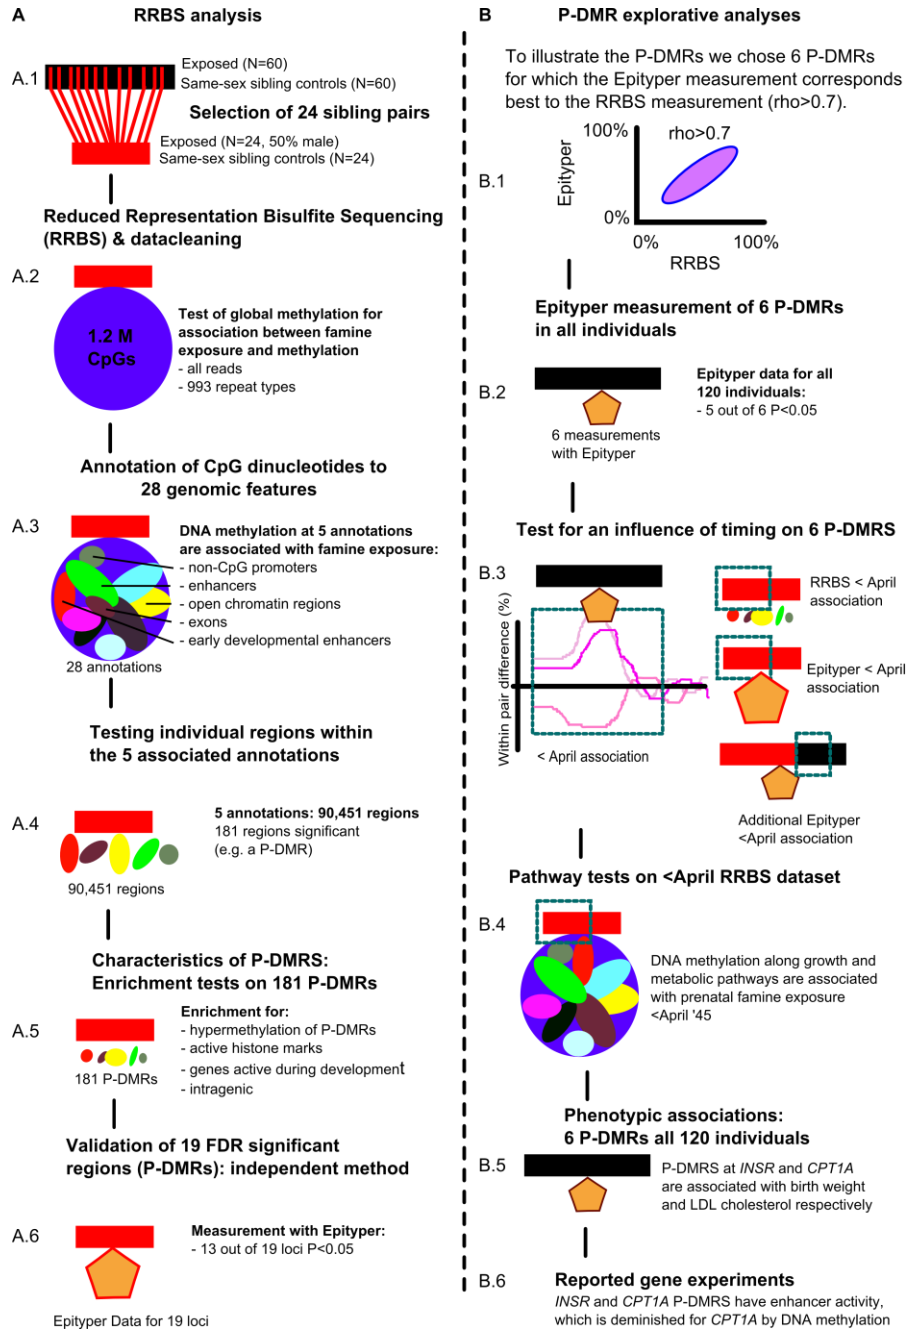

## Supplementary Figure 1. Flow chart.

Overview of the experimental workflow. Starting with the selection of individuals for RRBS, data cleaning and genome-scale analyses (A) and region specific analyses (B).

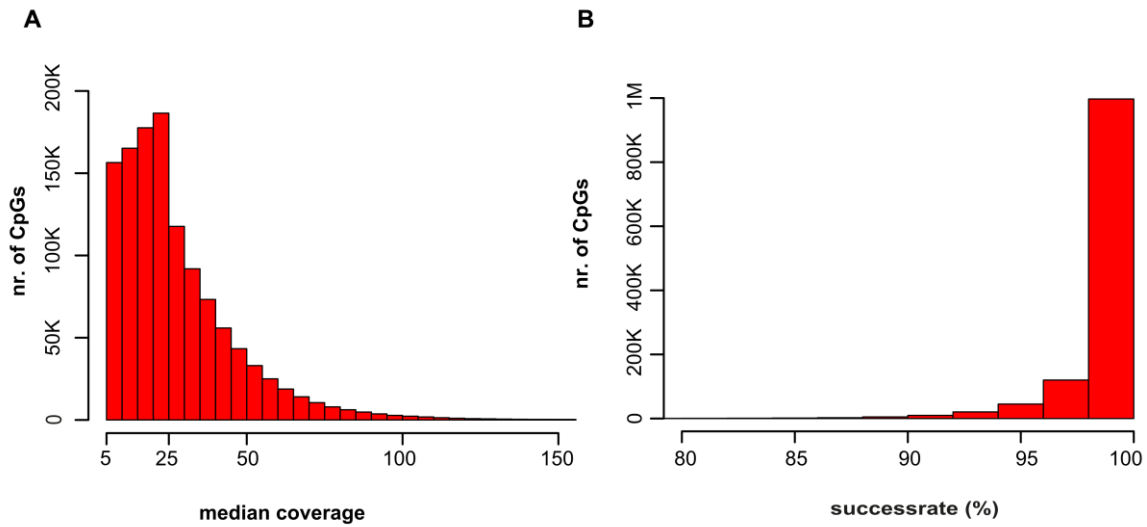

*Supplementary Figure 2. Histograms of the median coverage and success rate per CpG dinucleotide*

- A. Histogram of the median coverage (e.g. sequencing depth) over the 48 individuals of the CpG dinucleotides included in the analyses (N=1.206.149).
- B. Histogram of the success rate for each CpG CpG dinucleotides included in the analyses for the 48 individuals.

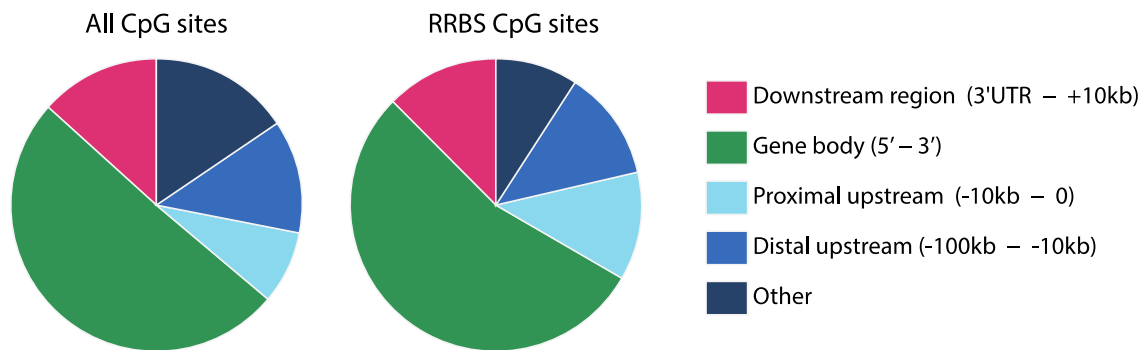

***Supplementary Figure 3. Distribution of all (28.2M) and RRBS-interrogated (1.2M) CpG dinucleotides across the human genome relative to genes***

Pie charts depicting the percentage of the CpG sites contained within different genomic features, namely regions downstream of genes (Downstream region), the genes themselves (Gene body), proximal promoters (Proximal upstream) and more distal upstream regions (Distal upstream). All CpGs located more than 100kb upstream and more than 10kb downstream of an Entrez Gene ID are designated als ‘other’. The left pie chart depicts the distribution of all ~28M CpG sites in the human genome, while the pie chart on the right the 1.2M CpG dinucleotides measured with RRBS after data cleaning. The distribution is remarkably similar, only a slight depletion of ‘other’ is seen.

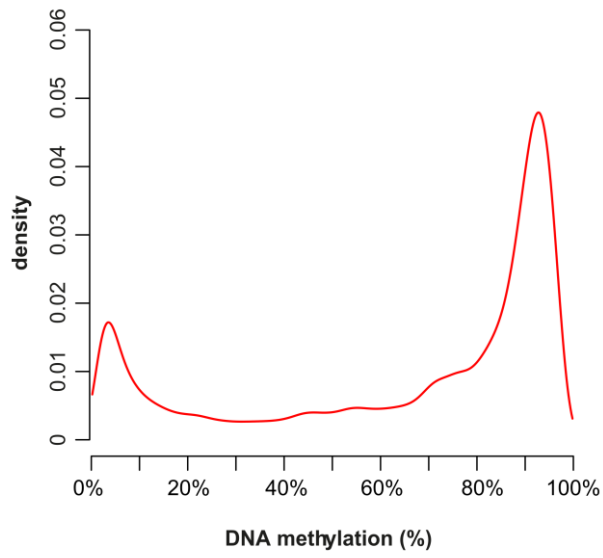

*Supplementary Figure 4. Density plot of the average methylation of the CpG dinucleotides*

Density plot of mean methylation of all 1.2 M CpG dinucleotides after data filtering. All CpG dinucleotides with a median methylation of 0% or 100% were removed; however, the classical bimodal distribution of DNA methylation is still apparent.

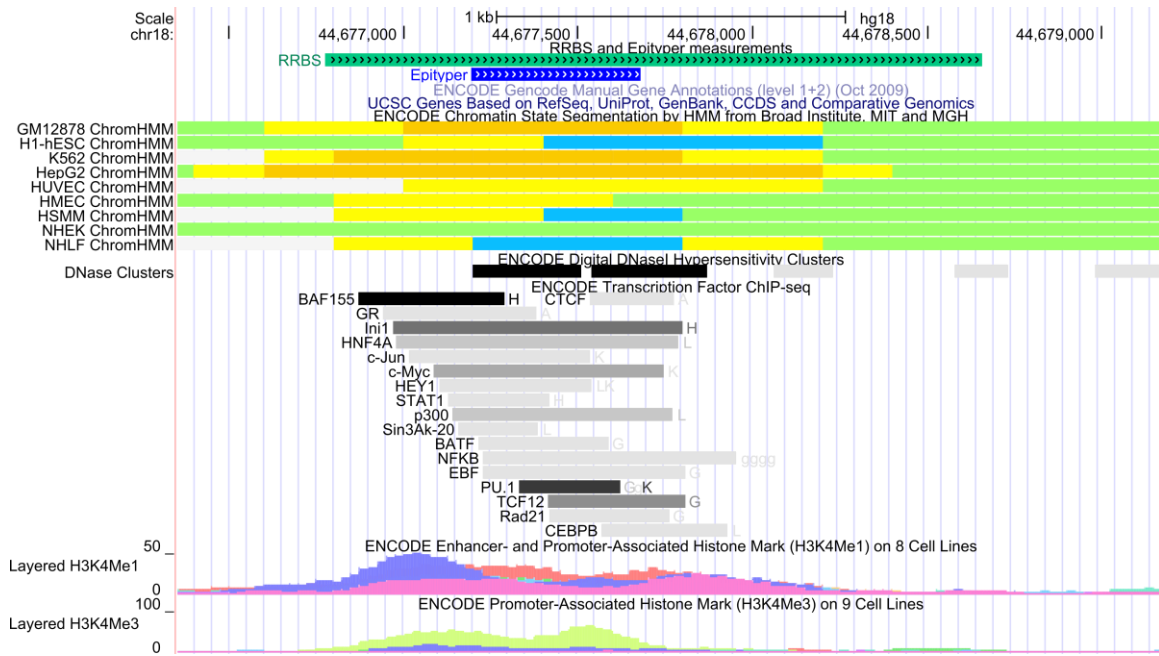

**Supplementary Figure 5A. The SMAD7 P-DMR**

The RRBS and Epityper measurements are located in the enhancer (orange/yellow) and insulator (blue) histone state at a strong DNaseI hypersensitivity locus in over 30 cell lines and overlapping various transcription factor binding sites, including the DNA methylation sensitive PU.1, HNF4A, p300, CTCF, CEBPB and NFKB factors.

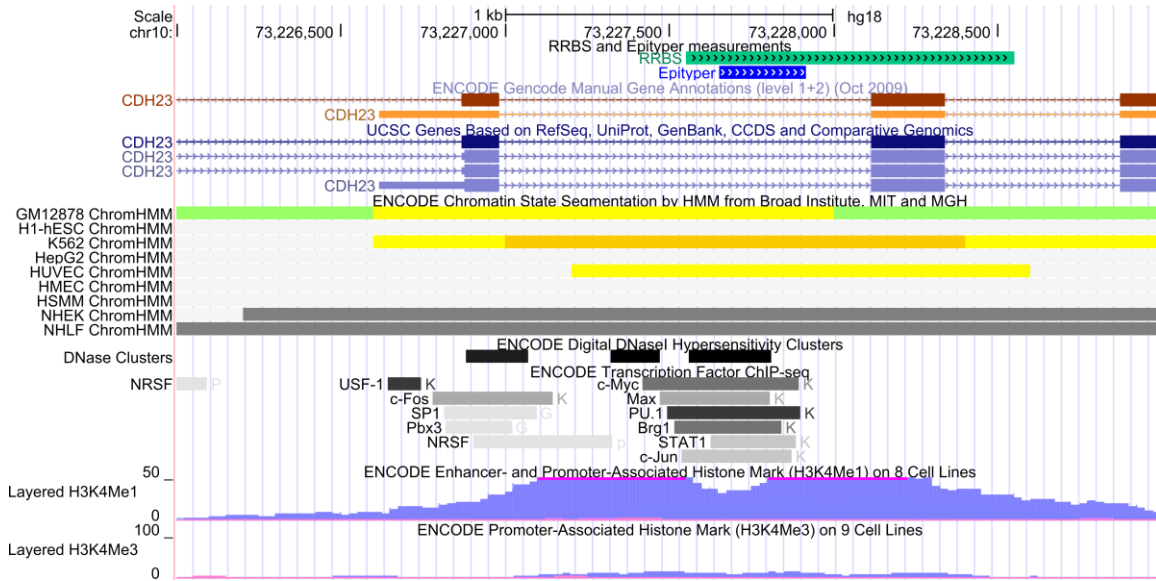

### Supplementary Figure 5B. The CDH23 P-DMR

The RRBS and Epityper measurements overlap part of an enhancer (orange/yellow) histone state in multiple cell lines, including one derived from blood (GM12877) and liver (K562). The locus overlaps a hypersensitivity locus in over 30 cell lines and overlaps with various methylation sensitive transcription factors, including PU.1.

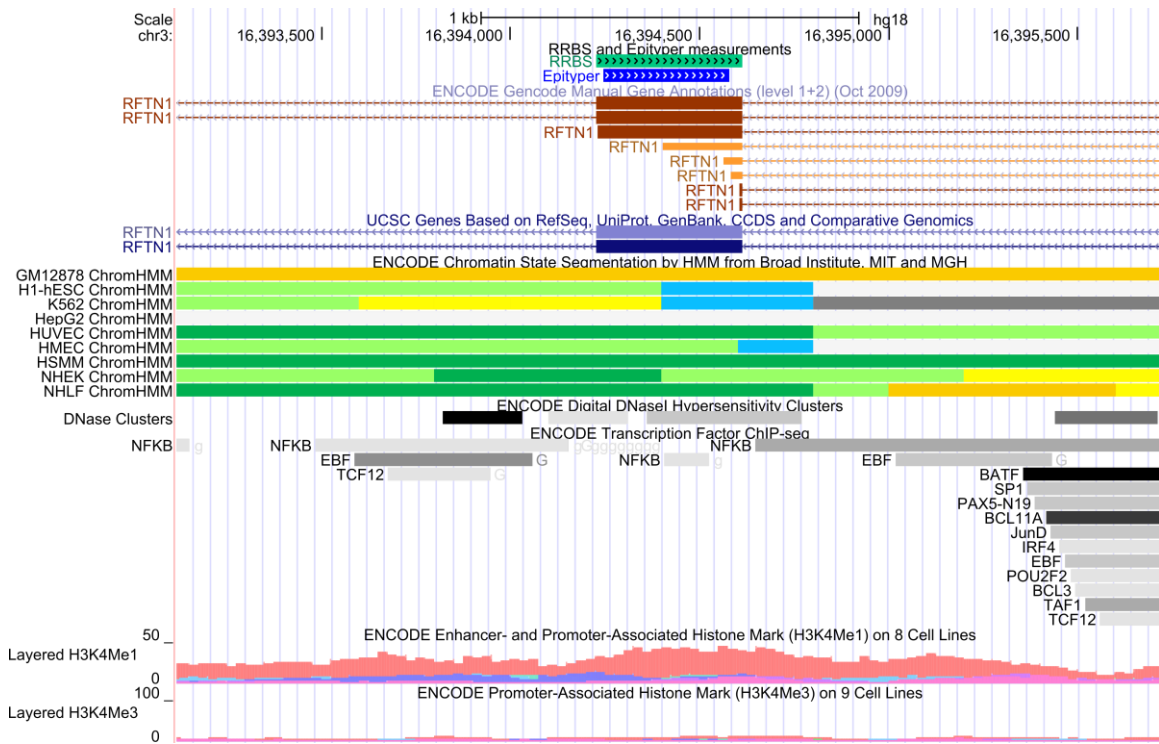

### Supplementary Figure 5C. The *RFTN1* P-DMR

The P-DMR overlaps an exon or the 5'-UTR from various *RFTN1* isoforms at a site characterized as a strong enhancer (orange) or isolator (blue) histone state in various cell lines.





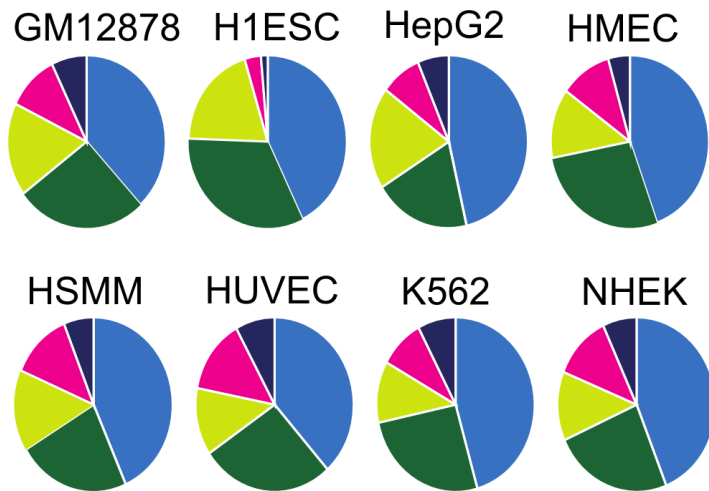

Intragenic Chrom HMM:

- 4 strong enhancer
- 5 strong enhancer
- 6 weak enhancer
- 7 weak enhancer

-----  
 ■ All extra-genic enhancers

***Supplementary Figure 6. Proportion of intragenic enhancers in core ENCODE cell lines***

Each pie-chart represents one ENCODE cell line. Different enhancer states as defined by chromHMM are marked by different colors. All enhancers outside gene bodies have been colored light blue. Clear is that intragenic enhancers are slightly more common than extra genic enhancers in all these cell lines.

Supplementary Table 1. Population and sequencing characteristics

| Variable                        | Quantity    |
|---------------------------------|-------------|
| Individuals sequenced           | 48          |
| Same-sex sibling controls       | 24          |
| Age (SD)                        | 58.3y (2.1) |
| Percentage of males             | 50%         |
| Number of pre-war born sibling  | 12          |
| Male pre-war born siblings      | 6           |
| Median quality score reads (SD) | 35.3 (2.0)  |
| High quality reads million (SD) | 25.6 (7.3)  |
| Reads mapped uniquely (SD)      | 74.1%(10.7) |
| Bisulfite conversion (SD)       | 98.9%(0.7)  |

*Supplementary Table 2. Data filtering steps*

| Filtering steps             | Total CpGs | CpGs matching |
|-----------------------------|------------|---------------|
| Total unique CpGs           | 3.174.757  |               |
| Random chromosome           |            | 3.195         |
| Median Coverage <=5         |            | 1.296.450     |
| Median Coverage >200        |            | 2.935         |
| Median methylation = 0%     |            | 1.400.875     |
| Median methylation = 100%   |            | 252.439       |
| Total included unique CpGs* | 1.206.149  |               |

\*Considerable numbers of CpG dinucleotides match multiple filtering criteria, resulting in a final number of included CpG dinucleotides higher than the subtraction of the 'CpGs matching' column from the total unique CpGs.

**Supplementary Table 3. Epityper associations with prenatal famine**

| Annotation                |                  | Chosen by:       | RRBS<br>(N=48)    |                          |                      |                      | RRBS-Epityper            | Epityper<br>(N=48)      |                      |
|---------------------------|------------------|------------------|-------------------|--------------------------|----------------------|----------------------|--------------------------|-------------------------|----------------------|
| Feature type <sup>1</sup> | Nearest Gene     | criterion        | Mean meth.<br>(%) | Within pair<br>diff. (%) | p <sup>2</sup>       | P <sub>FDR</sub>     | correlation <sup>3</sup> | Within pair<br>diff.(%) | p <sup>4</sup>       |
| 1                         | <i>DHRS4L2</i>   | Lowest p-val     | 3.7               | 1.8                      | 3.0x10 <sup>-9</sup> | 2.5x10 <sup>-4</sup> | 0.27                     | 0.4                     | 0.71                 |
| 2                         | <i>EHD1</i>      | 2 <sup>nd</sup>  | 45.7              | -5.2                     | 5.7x10 <sup>-9</sup> | 2.5x10 <sup>-4</sup> | 0.50                     | -4.0                    | 2.2x10 <sup>-4</sup> |
| 2                         | <i>DAPK2</i>     | 3 <sup>rd</sup>  | 67.1              | 4.5                      | 1.1x10 <sup>-8</sup> | 2.6x10 <sup>-4</sup> | 0.57                     | 1.9                     | 6.4x10 <sup>-3</sup> |
| 2 & 3                     | <i>LOC554202</i> | 4 <sup>th</sup>  | 24.2              | 6.5                      | 1.7x10 <sup>-8</sup> | 2.6x10 <sup>-4</sup> | 0.52                     | 3.5                     | 3.2x10 <sup>-3</sup> |
| 2                         | <i>LSM14B</i>    | 5 <sup>th</sup>  | 52.0              | 3.5                      | 1.7x10 <sup>-8</sup> | 2.6x10 <sup>-4</sup> | 0.17                     | 1.1                     | 0.24                 |
| 2                         | <i>ASS1</i>      | 6 <sup>th</sup>  | 68.2              | -4.9                     | 4.8x10 <sup>-8</sup> | 6.2x10 <sup>-4</sup> | 0.22                     | -0.5                    | 0.42                 |
| 2                         | <i>SMAD7</i>     | 7 <sup>th</sup>  | 21.3              | 4.2                      | 1.0x10 <sup>-7</sup> | 1.1x10 <sup>-3</sup> | 0.78                     | 4.7                     | 3.0x10 <sup>-4</sup> |
| 2 & 3                     | <i>CDH23</i>     | 8 <sup>th</sup>  | 12.4              | 4                        | 1.3x10 <sup>-7</sup> | 1.1x10 <sup>-3</sup> | 0.73                     | 3.9                     | 8.1x10 <sup>-5</sup> |
| 2                         | <i>MIR4315-1</i> | 9 <sup>th</sup>  | 30.2              | 8.9                      | 2.1x10 <sup>-7</sup> | 1.7x10 <sup>-3</sup> | 0.47                     | 2.0                     | 0.077                |
| 2                         | <i>ZIC1</i>      | 11 <sup>th</sup> | 5.9               | 1.4                      | 3.2x10 <sup>-7</sup> | 2.1x10 <sup>-3</sup> | 0.49                     | 0.6                     | 0.011                |
| 2                         | <i>INSR</i>      | Chosen           | 43.3              | 8.1                      | 3.9x10 <sup>-6</sup> | 0.01                 | 0.72                     | 3.9                     | 0.018                |
| 2                         | <i>HOXD3</i>     | Chosen           | 13.5              | 3.2                      | 4.3x10 <sup>-6</sup> | 0.01                 | 0.26                     | 1.2                     | 0.066                |
| 2                         | <i>RPTOR</i>     | Chosen           | 83.1              | 1.7                      | 9.1x10 <sup>-6</sup> | 0.02                 | 0.63                     | 8.6                     | 2.4x10 <sup>-4</sup> |
| 2 & 4                     | <i>RFTN1</i>     | Chosen           | 86.3              | -2.3                     | 3.2x10 <sup>-5</sup> | 0.03                 | 0.71                     | -1.9                    | 2.4x10 <sup>-3</sup> |
| 2                         | <i>STX1A</i>     | Chosen           | 29.1              | 3.7                      | 3.2x10 <sup>-5</sup> | 0.03                 | -0.17                    | 1.1                     | 0.17                 |
| 2                         | <i>CPT1A</i>     | Chosen           | 67.0              | 4.5                      | 4.0x10 <sup>-5</sup> | 0.03                 | 0.70                     | 4.0                     | 0.015                |
| 2                         | <i>SCARB1</i>    | Chosen           | 74.7              | -10.5                    | 5.3x10 <sup>-5</sup> | 0.04                 | 0.55                     | -4.9                    | 1.7x10 <sup>-4</sup> |
| 2                         | <i>KLF13</i>     | Chosen           | 67.1              | -7.9                     | 6.1x10 <sup>-5</sup> | 0.04                 | 0.79                     | -5.7                    | 7.9x10 <sup>-4</sup> |
| 2                         | <i>KLF6</i>      | Chosen           | 44.9              | -6.2                     | 7.9x10 <sup>-5</sup> | 0.046                | 0.52                     | -2.6                    | 2.6x10 <sup>-4</sup> |

1. Type of genomic feature, 1 = non-CGI 'bonafide' promoter, 2 = Open chromatin, 3= enhancer, 4 = exon.
2. Two-sided P value resulting from a generalized linear mixed model where the analysis was weighted for sequencing depth.
3. The Pearson correlation between the average methylation of the RRBS region and the average of the CpG dinucleotides measured in the smaller region measured by Epityper.
4. The P value coming from a linear mixed model using the DNA methylation data generated with Epityper.

Supplementary Table 4. EpiTYPER primers

| NR <sup>1</sup> | Locus                        |                     | Sequence                       |
|-----------------|------------------------------|---------------------|--------------------------------|
| 0               | HUGO                         | Strand              | FORWARD <sup>3</sup> (5'-3')   |
|                 | coordinates(hg18)            | T (°C) <sup>2</sup> | REVERSE <sup>4</sup> (5'-3')   |
| 1               | DHRS4L2                      | -                   | GAGGATAGGGGTATTGGAGGTAAAG      |
|                 | chr14:23,527,972-23,528,213  | 53                  | AAACCCAAACTTACTAATCTAATCCATA   |
| 2               | EDH1                         | +                   | TTTGTTGTGAGGGAAATATAGTGATTG    |
|                 | chr11:64,389,159-64,389,510  | 48                  | CCCTACCTTAATAAATACCAAAACCTAAA  |
| 3               | DAPK2                        | -                   | TGATGATTTAATTTTGTGGGTTTGTGT    |
|                 | chr15:62,062,839-62,063,043  | 53                  | AAATCCTAAAAACCCCACTCACAAC      |
| 4               | LOC554202                    | +                   | AATTATTGGAGTGATAAATTTTTTT      |
|                 | chr9:21,595,548-21,595,759   | 48                  | CTATTTCTAATAACCCATATTTAC       |
| 5               | LSM14B                       | +                   | TTGTTTAGGAGGGTTTATTTTATGGTT    |
|                 | chr20:60,141,366-60,141,715  | 53                  | ATAACAAACACTAACTCCCAAACCTCTAAC |
| 6               | ASS1                         | -                   | TGTTTTAGGGTGGGTATAGTTTAGGT     |
|                 | chr9:132,344,966-132,345,523 | 46                  | ACCAAACCTCCTTAAAACCTTTCATA     |
| 7               | SMAD7                        | +                   | TTGGGTTATTTTTATGTGTGGTGT       |
|                 | chr18:44,677,194-44,677,679  | 53                  | CAACAACAACTCTTCTACATCTAACT     |
| 8               | CDH23                        | +                   | ATAGGGGAAGTTAGGTTTGGTAGAT      |
|                 | chr10:73,227,653-73,227,914  | 53                  | ACTAAATAACCCTAATAAAACCCTC      |

|    |                               |             |                                |
|----|-------------------------------|-------------|--------------------------------|
| 9  | miR4315-1                     | +           | TTTTTTTTGTTTTTGATAGGGTTATG     |
|    | chr17:55,579,661-55,579,969   | 53          | CCCAATATTCTAAATTCAAATCTTTACTCT |
| 10 | HIF1AN                        | -           | AAAAGTGTTGATAGGGTTAGGAGAG      |
|    | chr10:102,319,419-102,319,893 | Not working | TTTTATATATAACTTAATATAACAACATCA |
| 11 | ZIC1                          | +           | TTTGGGTTTTTTGTTTTAAGAGGT       |
|    | chr3:148,612,363-148,612,675  | 53          | ACTTCCACCTAACTCCTAATTTCTAATTTT |
| C1 | INSR                          | -           | TTTTTAGGAGGTTTTTAGAGTTTTTAGATT |
|    | chr19:7,110,140-7,110,418     | 44          | CTAACCTCAAATAATCCACCCAC        |
| C2 | KLF13                         | -           | AGGTAGGTATTTGTATAGAGGGGTTA     |
|    | chr15:29,425,223-29,425,563   | 53          | AAACTAACCACACCAAACTTAATATACTT  |
| C3 | STX1A                         | +           | GGTGAGGGTTATAGATTAGGAGGT       |
|    | chr7:72,759,326-72,759,710    | 53          | AAACAACTAACCAACAAACAAACT       |
| C4 | RPTOR                         | -           | GTTGGATGAGTAGGTTTTGGATGG       |
|    | chr17:76,479,050-76,479,293   | 46          | CAATTCATAAAACAAAAAATTTAAATA    |
| C5 | CPT1A                         | -           | TTTAGGATATGGGTAAGTTTTGTTTTATAT |
|    | chr11:68,286,598-68,286,810   | 48          | AAATAATAACCTCCAAAAACCTTTAAAAA  |
| C6 | RFTN1                         | +           | TATGTATTTTTAAGGGTTGTTTTT       |
|    | chr3:16,394,247-16,394,578    | 48          | TAATATTATACCTCAATACCATTCTCTAT  |
| C7 | HOXD3                         | +           | TTTGGTGGTTAATTTGGTTAATT        |
|    | chr2:176,735,594-             | 48          | ATAAAAACATCCCCTCAAAAAA         |

|    |                                   |    |                            |
|----|-----------------------------------|----|----------------------------|
|    | 176,735,816                       |    |                            |
| C8 | KLF6                              | -  | AATAGTTTGAATTTAGATGTTAGTAG |
|    | chr10:3,813,737-<br>3,814,216     | 46 | CCAAAATAATACAATAATAAC      |
| C9 | SCARB1                            | +  | GGTGGTTAGGGTTAGTAAGAGAAGTA |
|    | chr12:123,789,477-<br>123,789,580 | 53 | CCTATAACTCAAACCTCAAAAAAAC  |

1. Primer pair number corresponding to the lowest p-value in RRBS (nr1-11; no reliable PCR was possible for nr10, chr10:102319110-102321355 [*HIF1AN*]), several regions were chosen (C1-C9).
2. Sequence of the forward PCR primer: for epiTYPER a tag with the following sequence is added 5': 5'-AGGAAGAGAG-sequence.
3. The annealing temperature in the PCR program: 15 min at 95°C, 15 minutes at 95°C, 4 rounds of 20 seconds at 95°C, 30 seconds at 65°C, 1 minute at 72°C; followed by 40 rounds, 20 seconds at 95°C, 30 seconds at **Ann.T** and 1 minute at 72°C; ending with 3 minute s at 72°C.
4. The sequence of the reverse primer, for epiTYPER a tag with the following sequence is added 5': 5'-CAGTAATACGACTCACTATAGGGAGAAGGCT-sequence

*Supplementary Table 5. Number of CpG sites measured, and overlap between RRBS and Epityper measurement*

| Nearest Gene     | location RRBS <sup>1</sup>   | Location Epityper <sup>2</sup> | Nr CpGs RRBS | Nr CpGs Epityper | Nr CpGs overlapping between assays |
|------------------|------------------------------|--------------------------------|--------------|------------------|------------------------------------|
| <i>DHRS4L2</i>   | chr14:23,526,866-23,528,866  | chr14:23,527,972-23,528,213    | 5            | 8                | 5                                  |
| <i>EHD1</i>      | chr11:64,374,355-64,390,875  | chr11:64,389,159-64,389,510    | 26           | 9                | 8                                  |
| <i>DAPK2</i>     | chr15:62,060,557-62,063,275  | chr15:62,062,839-62,063,043    | 7            | 12               | 2                                  |
| <i>LOC554202</i> | chr9:21,594,650-21,595,650   | chr9:21,595,548-21,595,759     | 3            | 3                | 2                                  |
| <i>LSM14B</i>    | chr20:60,141,215-60,146,975  | chr20:60,141,366-60,141,715    | 7            | 6                | 3                                  |
| <i>ASS1</i>      | chr9:132,344,794-132,346,579 | chr9:132,344,966-132,345,523   | 12           | 14               | 3                                  |
| <i>SMAD7</i>     | chr18:44,676,775-44,678,655  | chr18:44,677,194-44,677,679    | 7            | 7                | 4                                  |
| <i>CDH23</i>     | chr10:73,227,550-73,228,550  | chr10:73,227,653-73,227,914    | 3            | 4                | 3                                  |
| <i>miR4315</i>   | chr17:55,579,535-55,580,790  | chr17:55,579,661-55,579,969    | 3            | 6                | 3                                  |
| <i>ZIC1</i>      | chr3:148,611,075-148,612,495 | chr3:148,612,363-148,612,675   | 21           | 14               | 5                                  |
| <i>INSR</i>      | chr19:7,110,011-7,111,334    | chr19:7,110,140-7,110,418      | 2            | 3                | 2                                  |
| <i>KLF13</i>     | chr15:29,423,875-29,427,520  | chr15:29,425,223-29,425,563    | 8            | 6                | 6                                  |

|               |                               |                               |    |    |    |
|---------------|-------------------------------|-------------------------------|----|----|----|
| <i>STX1A</i>  | chr7:72,758,075-72,760,255    | chr7:72,759,326-72,759,710    | 7  | 8  | 4  |
| <i>RPTOR</i>  | chr17:76,471,363-76,483,344   | chr17:76,479,050-76,479,293   | 45 | 6  | 3  |
| <i>CPT1A</i>  | chr11:68,285,186-68,289,024   | chr11:68,286,598-68,286,810   | 15 | 8  | 7  |
| <i>RFTN1</i>  | chr3: 16,289,024-16,394,613   | chr3:16,394,247-16,394,578    | 10 | 11 | 5  |
| <i>HOXD3</i>  | chr2:176,734,540-176,735,745  | chr2:176,735,594-176,735,816  | 7  | 6  | 2  |
| <i>KLF6</i>   | chr10:3,810,815-3,816,315     | chr10:3,813,737-3,814,216     | 20 | 18 | 10 |
| <i>SCARB1</i> | chr12:123,788,495-123,792,067 | chr12:123,789,477-123,789,580 | 6  | 6  | 4  |

1. Genomic location of the genomic feature, as used for the original analysis of the RRBS data.
2. Genomic location of the Epityper PCR amplicon.



Supplementary Table 6. Validation of the within pair differences in all 60 sibships with EpiTYPER.

|                           | Exposed   |       | Unexposed |       |                               |                    |                |
|---------------------------|-----------|-------|-----------|-------|-------------------------------|--------------------|----------------|
| <i>CDH23</i> <sup>1</sup> | Meth. (%) | SD(%) | Meth. (%) | SD(%) | Success rate (%) <sup>2</sup> | Diff. <sup>3</sup> | P <sup>4</sup> |
| CpG_1                     | 24.8      | 5.6   | 22.4      | 6.1   | 100                           | 2.3                | 0.0079         |
| CpG_2                     | 22.6      | 6.2   | 20.5      | 6.1   | 100                           | 2.1                | 0.019          |
| CpG_3                     | 19.8      | 5.1   | 17.5      | 5.2   | 100                           | 2.2                | 0.0048         |
| CpG_4                     | 22.5      | 6.1   | 20.1      | 6.3   | 100                           | 2.3                | 0.0078         |
| <i>SMAD7</i>              |           |       |           |       |                               |                    |                |
| CpG_1                     | 23.7      | 6.9   | 20.6      | 7.1   | 95                            | 3.0                | 0.0052         |
| CpG_2                     | 22.6      | 6.4   | 20.3      | 5.9   | 96.7                          | 2.3                | 0.014          |
| CpG_3                     | 18.9      | 7.4   | 15.6      | 7.3   | 96.7                          | 3.1                | 0.0077         |
| CpG_4                     | 14        | 5.8   | 10.6      | 5.9   | 94.2                          | 3.3                | 0.0034         |
| CpG_5.6                   | 20.7      | 5.7   | 18.3      | 5.9   | 96.7                          | 2.4                | 0.013          |
| CpG_7                     | 23        | 7.1   | 20.5      | 7.8   | 91.7                          | 2.6                | 0.046          |
| <i>INSR</i>               |           |       |           |       |                               |                    |                |
| CpG_2                     | 33.5      | 5.6   | 30.6      | 5.8   | 95.8                          | 2.9                | 0.0031         |
| CpG_3                     | 40        | 7.2   | 38        | 6     | 86.7                          | 1.7                | 0.13           |
| CpG_5                     | 43.4      | 7.3   | 41.7      | 6.5   | 91.7                          | 1.7                | 0.15           |
| <i>KLF13</i>              |           |       |           |       |                               |                    |                |
| CpG_2                     | 75.8      | 9.5   | 79.4      | 11.3  | 77.5                          | -3.7               | 0.07           |
| CpG_4                     | 65.4      | 7.8   | 68.4      | 8.6   | 99.2                          | -3.0               | 0.019          |
| CpG_5                     | 67.2      | 7.1   | 70.2      | 8.5   | 100                           | -2.9               | 0.016          |
| CpG_6                     | 64.2      | 7     | 67.4      | 9     | 100                           | -3.2               | 0.015          |
| CpG_7                     | 58.2      | 6.7   | 61.1      | 8.2   | 98.3                          | -2.8               | 0.020          |
| CpG_9                     | 62.3      | 7     | 65.5      | 8.5   | 98.3                          | -3.1               | 0.013          |
| <i>RFTN1</i>              |           |       |           |       |                               |                    |                |
| CpG_1                     | 89.6      | 3     | 90.3      | 3.1   | 100                           | -0.7               | 0.13           |
| CpG_2                     | 85        | 3.6   | 85.6      | 3.5   | 100                           | -0.7               | 0.19           |
| CpG_3                     | 81.5      | 3.7   | 82.8      | 3.5   | 100                           | -1.2               | 0.046          |
| CpG_4                     | 90.5      | 4.7   | 91.6      | 3.3   | 86.7                          | -0.9               | 0.23           |
| CpG_5                     | 82.3      | 2.8   | 83.2      | 2.7   | 100                           | -0.9               | 0.054          |

|              |      |      |      |      |      |      |       |
|--------------|------|------|------|------|------|------|-------|
| CpG_6.7      | 92.9 | 2.8  | 93.5 | 2.6  | 100  | -0.6 | 0.21  |
| CpG_8.9      | 84.1 | 3.8  | 85.2 | 5.1  | 100  | -0.9 | 0.21  |
| CpG_10       | 81.6 | 4.8  | 82.8 | 4.9  | 100  | -1.2 | 0.12  |
| CpG_12       | 81.8 | 4    | 83   | 4.2  | 100  | -1.2 | 0.07  |
| <i>CPT1A</i> |      |      |      |      |      |      |       |
| CpG_2.3      | 41.3 | 10.9 | 39.1 | 11.2 | 99.2 | 2.4  | 0.09  |
| CpG_5.6      | 58.1 | 8.9  | 56.3 | 8.9  | 99.2 | 1.9  | 0.11  |
| CpG_8.9      | 76.5 | 3.8  | 75.4 | 4    | 99.2 | 1.1  | 0.05  |
| CpG_10       | 49.1 | 8.8  | 46.9 | 8.7  | 99.2 | 2.4  | 0.032 |
| CpG_12       | 34   | 8    | 31.7 | 8.8  | 99.2 | 2.4  | 0.037 |

1. The locus and individual CpG sites measured with Epityper after data filtering. The CpG dinucleotides are measured from the forward primer onward.
2. The success rate of the measurement in the 120 individuals
3. The average within pair differences in the 60 sib ships  
The two-sided P-value resulting from a linear mixed model

**Supplementary Table 7. Neutrophil variation and DNA methylation at the P-DMRs**

| P-DMR        | Beta <sup>1</sup><br>(%methylation/<br>%neutrophils) | p <sup>2</sup>       | SD change required<br>to explain famine<br>association <sup>3</sup> |
|--------------|------------------------------------------------------|----------------------|---------------------------------------------------------------------|
| <i>SMAD7</i> | -0.19                                                | 0.17                 | -5.1                                                                |
| <i>CDH23</i> | -0.35                                                | 3.1x10 <sup>-3</sup> | -1.9                                                                |
| <i>INSR</i>  | 0.02                                                 | 0.91                 | 31.4                                                                |
| <i>CPT1A</i> | -0.51                                                | 0.11                 | -1.2                                                                |
| <i>KLF13</i> | 0.33                                                 | 0.08                 | -2.8                                                                |
| <i>RFTN1</i> | 0.00                                                 | 0.99                 | ∞                                                                   |

1. The effect size of the association of the percentage of neutrophils in blood with methylation in 44 unrelated individuals from the control population in the Leiden Longevity Study.
2. Two-sided p-value for the association between DNA methylation and the percentage of neutrophils in blood.
3. The size of the change in neutrophil percentage in blood, expressed in standard deviations (SD), required to explain in full the association between DNA methylation and prenatal famine exposure (3.3% change in neutrophils is 1 SD change).

Only *CDH23* is affected by blood cell heterogeneity, but the change in blood cell composition to explain the observed famine association is so large (~2SD) that this is a highly unlikely explanation.

**Supplementary Table 8. Primers to generate the P-DMR *CPT1A* and *INSR* constructs**

| P-DMR        | Type           | Primer: 5' – 3'                 | Restriction enzyme used |
|--------------|----------------|---------------------------------|-------------------------|
| <i>INSR</i>  | Forward        | TTTGGTGGAGTCTTGCTCTG            |                         |
|              | Reverse        | TTACAGACCTGAGCCACTGC            |                         |
|              | Nested forward | ATCAGCTGCAGGAGTGCAATGGCGTGATCT  | PstI                    |
|              | Nested reverse | ATCAGACTAGTGGGCCCATTTCTTCTTTAG  | SpeI                    |
| <i>CPT1A</i> | Forward        | TGGGTAAGATTGGCAAGGAG            |                         |
|              | Reverse        | AATGTGCAGGGATGTGTCTG            |                         |
|              | Nested forward | ATCAGCCTGCAGGTTTGAGACGGGGTCTTGC | SbfI                    |
|              | Nested reverse | ATCAGACTAGTTGCTGCTTATCACCTTCTCG | SpeI                    |

*Supplementary Table 9. Bisulfite primers to check DNA methylation of inserted P-DMR in CpGL-P-DMR/EF1 vector*

| <b>Primer name</b>         | <b>Primer: 5' -3'</b>          |
|----------------------------|--------------------------------|
| BS-pCpGL-INSR/EF1 forward  | GAGTGATATTATTGGTGGTAGTTTTTA    |
| BS-pCpGL-INSR/EF1 reverse  | CTATCCCAACTCTAAACTCATATACTATAT |
| BS-pCpGL-CPT1A/EF1 forward | TTGGGGTGTAGGAAGAATGTTTAGTAG    |
| BS-pCpGL-CPT1A/EF1 reverse | CTCCTCTCCAACCTAACCCCTCAAC      |

*Supplementary Table 10. Primers used to sequence vector and check insert*

| <b>Primer name</b>   | <b>Primer: 5' -3'</b>     | <b>Use</b>                   |
|----------------------|---------------------------|------------------------------|
| pCpGL_Forward        | TAAATCTCTTTGTTTCAGCTCTCTG | PCR and Sanger sequencing    |
| pCpGL-Empty_Reverse  | TCTTGTAGTCTTGTAGGCTCCTC   | Used for basic vector        |
| pCpGL-Insert_Reverse | TTTCTTAATATTCTTGGCATCCT   | Used when P-DMR was inserted |
